# Supplementary material for: Parenting and Anxiety: Bi-directional Relations in Young Children
Source: Springer Nature journal article supplement (doi:10.1007/s10802-016-0223-z), 2016-11-08
Supplement: MOESM1 [file 11030964]

Table 1. Correlations between manifest indicators

|  | Variable number | |  |  |  |  |  |  |  |  |
| --- | --- | --- | --- | --- | --- | --- | --- | --- | --- | --- |
|  | 1 | 2 | 3 | 4 | 5 | 6 | 7 | 8 | 9 | 10 |
| Anxiety wave 1 |  |  |  |  |  |  |  |  |  |  |
| 1. DISC anxiety | 1 |  |  |  |  |  |  |  |  |  |
| 2. CSI GAD | .44** | 1 |  |  |  |  |  |  |  |  |
| 3. CSI separation anxiety | .36** | .55** | 1 |  |  |  |  |  |  |  |
| Anxiety wave 2 |  |  |  |  |  |  |  |  |  |  |
| 4. DISC anxiety | .48** | .38** | .25** | 1 |  |  |  |  |  |  |
| 5. CSI GAD | .31** | .56** | .34** | .48** | 1 |  |  |  |  |  |
| 6. CSI separation anxiety | .24** | .38** | .54** | .32** | .48** | 1 |  |  |  |  |
| Anxiety wave 3 |  |  |  |  |  |  |  |  |  |  |
| 7. DISC anxiety | .40** | .40** | .37** | .52** |  | .37** | 1 |  |  |  |
| 8. CSI GAD | .25** | .51** | .34** | .33** | .58** | .32** | .48** | 1 |  |  |
| 9. CSI SA | .15** | .33** | .42** | .18** | .30** | .56** | .36** | .42** | 1 |  |
| Parental support-engagement wave 1 |  |  |  |  |  |  |  |  |  |  |
| 10. Support 1 | -.02 | -.11** | -.09** | -.05 | -.05 | -.02 | -.07* | -.07 | -.06 | 1 |
| 11. Support 2 | -.05 | -.13** | -.09** | -.09* | -.10** | -.09** | -.13** | -.10** | -.14** | .70** |
| 12. Support 3 | -.03 | -.11** | -.06 | -.01 | -.04 | -.05 | -.09* | -.08* | -.06 | .65** |
| Parental support-engagement wave 2 |  |  |  |  |  |  |  |  |  |  |
| 13. Support 1 | -.08* | -.12** | -.01 | -.07* | -.04 | .01 | -.04 | -.09* | -.08* | .44** |
| 14. Support 2 | -.11* | -.18** | -.06 | -.08* | -.06 | -.03 | -.10** | -.12** | -.14** | .43** |
| 15. Support 3 | -.05 | -.13** | -.07* | -.01 | -.10** | -.02 | -.05 | -.14** | -.08* | .37** |
| Parental support-engagement wave 3 |  |  |  |  |  |  |  |  |  |  |
| 16. Support 1 | -.06 | *-.08 | -.02 | -.13** | -.09* | -.06 | -.15** | -.11** | -.03 | .34** |
| 17. Support 2 | -.14** | -.12** | -.08* | -.20** | -.12** | -.05 | -.16** | -.11** | -.04 | .39** |
| 18. Support 3 | -.02 | -.09* | -.09* | -.06 | -.10** | -.05 | -.14** | -.14** | .02 | .30** |
| Parental hostile-coercion wave 1 |  |  |  |  |  |  |  |  |  |  |
| 19. Hostility 1 | .25** | .32** | .21** | .23** | .27** | .18** | .23** | .22** | .10** | -.03 |
| 20. Hostility 2 | .14** | .19** | .13** | .19** | .22** | .10** | .24** | .19** | .10** | -.17** |
| 21. Hostility 3 | .10** | .13** | .00 | .12** | .10** | .00 | .08* | .09* | .00 | .19** |
| Parental hostile-coercion wave 2 |  |  |  |  |  |  |  |  |  |  |
| 22. Hostility 1 | .14** | .22** | .18** | .16** | .25** | .18** | .10** | .20** | .12** | -.04 |
| 23. Hostility 2 | .07 | .05 | .01 | .06 | .09** | -.01 | .06 | .04 | .01 | -.07 |
| 24. Hostility 3 | .08* | .05 | .01 | .08* | -.07* | .02 | .07* | .01 | -.03 | .09* |

Table 1 (continued)

|  | Variable number | |  |  |  |  |  |  |  |  |
| --- | --- | --- | --- | --- | --- | --- | --- | --- | --- | --- |
|  | 1 | 2 | 3 | 4 | 5 | 6 | 7 | 8 | 9 | 10 |
| Parental hostile-coercion wave 3 |  |  |  |  |  |  |  |  |  |  |
| 25. Hostility 1 | .19** | .20** | .18** | .15** | .14** | .11** | .19** | .23** | .10** | -.17** |
| 26. Hostility 2 | .13** | .22** | .16** | .11* | .10** | .10** | .18** | .10** | .20** | -.06 |
| 27. Hostility 3 | .03 | .07* | .03 | .04 | .06 | -.03 | .05 | .13** | .00 | .03 |
| Parental autonomy granting |  |  |  |  |  |  |  |  |  |  |
| 28. Autonomy wave 1 | -.10** | -.13** | -.12** | -.14** | -.08* | -.10** | -.14** | -.06 | -.10** | .22** |
| 29. Autonomy wave 2 | -.12** | -.07 | -.12** | -.07* | -.07* | -.15** | -.18** | -.04 | -.13** | .10** |
| 30. Autonomy wave 3 | -.05 | -.07 | -.08* | -.09* | -.06 | -.08* | -.09* | -.03 | -.12** | .13** |

Table 1 (continued)

|  | Variable Number | |  |  |  |  |  |  |  |  |
| --- | --- | --- | --- | --- | --- | --- | --- | --- | --- | --- |
|  | 11 | 12 | 13 | 14 | 15 | 16 | 17 | 18 | 19 | 20 |
| 11. Support 2 | 1 |  |  |  |  |  |  |  |  |  |
| 12. Support 3 | .69** | 1 |  |  |  |  |  |  |  |  |
| Parental support-engagement wave 2 |  |  |  |  |  |  |  |  |  |  |
| 13. Support 1 | .45** | .40** | 1 |  |  |  |  |  |  |  |
| 14. Support 2 | .52** | .45** | .80*** | 1 |  |  |  |  |  |  |
| 15. Support 3 | .43* | .49** | .70** | .70** | 1 |  |  |  |  |  |
| Parental support-engagement wave 3 |  |  |  |  |  |  |  |  |  |  |
| 16. Support 1 | .29** | .28** | .48** | .47** | .40** | 1 |  |  |  |  |
| 17. Support 2 | .48** | .40** | .51** | .58** | .47** | .71** | 1 |  |  |  |
| 18. Support 3 | .30** | .42** | .35** | .39** | .51** | .64** | .64** | 1 |  |  |
| Parental hostile-coercion wave 1 |  |  |  |  |  |  |  |  |  |  |
| 19. Hostility 1 | .02 | -.04 | -.12** | -.13** | -.17** | -.14** | -.16** | -.18** | 1 |  |
| 20. Hostility 2 | -.20** | -.20** | -.20** | -.22** | -.24** | -.16** | -.23** | -.19** | .50** | 1 |
| 21. Hostility 3 | .20** | .17** | .04 | .04 | .04 | .04 | .05 | .04 | .50** | .36** |
| Parental hostile-coercion wave 2 |  |  |  |  |  |  |  |  |  |  |
| 22. Hostility 1 | -.06 | -.08* | -.10** | -.09* | -.14** | -.04 | -.06 | -.11** | .48** | .28** |
| 23. Hostility 2 | -.11** | -.14** | -.22** | -.22** | -.20** | -.08* | -.08* | -.08* | .28** | .49** |
| 24. Hostility 3 | .15** | .08* | .11** | .13** | .12** | .11** | .15** | .09 | .27** | .19** |
| Parental hostile-coercion wave 3 |  |  |  |  |  |  |  |  |  |  |
| 25. Hostility 1 | -.12** | -.13** | -.11** | -.12** | -.18** | -.07 | -.12** | -.11** | .42** | .30** |
| 26. Hostility 2 | -.12** | -.06 | -.15** | -.14** | -.17** | -.09* | -.10** | -.06 | .23** | .36** |
| 27. Hostility 3 | .04 | .04 | .04 | .03 | .02 | .14** | .11** | .16** | .23** | .20** |
| Parental autonomy granting |  |  |  |  |  |  |  |  |  |  |
| 28. Autonomy wave 1 | .27** | .18** | .18** | .25** | .13** | .14** | .22** | .12** | -.14** | -.20** |
| 29. Autonomy wave 2 | .14** | .07 | .14** | .18** | .08* | .10** | .12** | .06 | -.09** | -.14** |
| 30. Autonomy wave 3 | .11** | .06** | .17** | .20** | .12** | .16** | .16** | .06 | -.17** | -.12** |

Table 1 (continued)

|  | Variable number | |  |  |  |  |  |  |  |  |
| --- | --- | --- | --- | --- | --- | --- | --- | --- | --- | --- |
|  | 21 | 22 | 23 | 24 | 25 | 26 | 27 | 28 | 29 | 30 |
| 21. Hostility 3 | 1 |  |  |  |  |  |  |  |  |  |
| Parental hostile-coercion wave 2 |  |  |  |  |  |  |  |  |  |  |
| 22. Hostility 1 | .26** | 1 |  |  |  |  |  |  |  |  |
| 23. Hostility 2 | .20** | .38** | 1 |  |  |  |  |  |  |  |
| 24. Hostility 3 | .47** | .45** | .27** | 1 |  |  |  |  |  |  |
| Parental hostile-coercion wave 3 |  |  |  |  |  |  |  |  |  |  |
| 25. Hostility 1 | .23** | .49** | .28** | .26** | 1 |  |  |  |  |  |
| 26. Hostility 2 | .13** | .20** | .34** | .13** | .31** | 1 |  |  |  |  |
| 27. Hostility 3 | .38** | .25** | .18** | .47** | .43** | .20** | 1 |  |  |  |
| Parental autonomy granting |  |  |  |  |  |  |  |  |  |  |
| 28. Autonomy wave 1 | .02 | -.11** | -.14** | .03 | -.17** | -.21** | .04 | 1 |  |  |
| 29. Autonomy wave 2 | .03 | -.06 | -.07* | .02 | -.10** | -.10** | .03 | .35** | 1 |  |
| 30. Autonomy wave 3 | -.06 | -.08* | -.08* | -.06 | -.10** | -.10** | -.05 | .30** | .38** | 1 |
|  |  |  |  |  |  |  |  |  |  |  |

Note: Abbreviations: DISC-Diagnostic Interview Schedule for Children-young child version; CSI-Child Symptom Inventory; GAD-generalized anxiety disorder; BDI-Beck Depression Inventory; CES-D-Center for Epidemiological Studies-Depression

* p < .05; ** p < .01.
